# Supplementary material for: Surface grain-size mapping of braided channels from SfM photogrammetry
Source: Copernicus journal article supplement (doi:10.5194/esurf-13-607-2025), 2025-07-22
Supplement: Supplementary file 2 [file esurf-13-607-2025-supplement.zip]

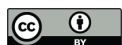

## *Supplement of*

# **Surface grain-size mapping of braided channels from SfM photogrammetry**

**Loïs Ribet et al.**

*Correspondence to:* Loïs Ribet ([lois.ribet@inrae.fr](mailto:lois.ribet@inrae.fr))

- [esurf-13-607-2025-supplement-title-page.pdf](#)
- [Supplementary materials location reaches.kml](#)
- [Supplementary materials.pdf](#)

The copyright of individual parts of the supplement might differ from the article licence.
